# Supplementary material for: Limitations of the 1 % experiment as the benchmark idealized experiment for carbon cycle intercomparison in C 4 MIP
Source: Copernicus journal article supplement (doi:10.5194/gmd-12-597-2019), 2019-02-06
Supplement: Supplementary file [file gmd-12-597-2019-supplement-title-page.pdf › gmd-12-597-2019-supplement-title-page.pdf]

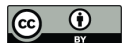

## *Supplement of*

# **Limitations of the 1 % experiment as the benchmark idealized experiment for carbon cycle intercomparison in C<sup>4</sup>MIP**

**A. H. MacDougall**

*Correspondence to:* Andrew Hugh MacDougall (amacdoug@stfx.ca)

- gmd-12-597-2019-supplement-title-page.pdf
- IdealPathways
  - A\_co2.2XCO2.Exp.nc
  - A\_co2.2XCO2.Logistic.nc
  - A\_co2.4XCO2.Exp.nc
  - A\_co2.4XCO2.Logistic.nc
  - A\_co2.8XCO2.Exp.nc
  - A\_co2.8XCO2.Logistic.nc

The copyright of individual parts of the supplement might differ from the CC BY 4.0 License.
